# Supplementary material for: Lymphangiogenic therapy prevents cardiac dysfunction by ameliorating inflammation and hypertension
Source: eLife. 2020 Nov 17;9:e58376. doi: 10.7554/eLife.58376 (PMC7695461; doi:10.7554/eLife.58376)
Supplement: Figure 1—source data 1. [file elife-58376-fig1-data1.xlsx]

## Sheet: Sheet1
Table 2: Clinical information.
Sample type	Total number	Age	Gender	Cardiac diseases
Healthy heart (HH)	18	Under 40: 6	Male: 16	none
		Age 40-60: 7	Female:1
		Age 60-80: 3	Unknown:1
		Unknown: 2
Chronic heart failure (CHF) heart	11	Age 40-60: 5	Male: 6	Hypertension& heart failure: 4
		Age 60-80: 5	Female:4	Hypertension & stroke & heart failure: 3
		Unknown: 1	Unknown:1	Myocardial infarction & heart failure: 3
				Cardiomyopathy & heart failure: 1
