# Supplementary material for: Lymphangiogenic therapy prevents cardiac dysfunction by ameliorating inflammation and hypertension
Source: eLife. 2020 Nov 17;9:e58376. doi: 10.7554/eLife.58376 (PMC7695461; doi:10.7554/eLife.58376)
Supplement: Figure 1—source data 2. [file elife-58376-fig1-data2.xlsx]

## Sheet: Sheet1
B. VEGFC expression			C. LYVE1 expression			D. PDPN expression			E. FLT4 expression
HH	CHF		HH	CHF		HH	CHF		HH	CHF
0.604357	0.96161		0.722777	1.02042		2.32214	1.15629		0.640767	0.669173
1.18661	0.769091		0.868992	0.16073		0.752577	0.393677		1.06154	0.969656
1.20267	0.972283		0.281459	0.428823		0.671024	0.674384		1.38892	0.66977
1.14334	1.06118		0.83112	0.729613		0.567702	0.448161		0.749118	0.665308
0.66973	0.585648		1.2955	0.728284		0.714496	0.675969		1.56956	0.630686
1.29769	0.866644		0.930385	0.135725		1.20356	0.519555		0.955626	0.768453
1.32129	0.484433		0.705204	0.874461		0.61388	0.938721		0.508192	1.14058
0.86795	0.995279		0.820188	0.074147		1.42193	0.47526		1.07995	0.662533
0.938022	0.745227		1.1586	1.57461		0.626491	0.970555		0.734329	0.937815
0.692231	0.602067		1.38661	0.396119		0.807629	0.972331		1.57338	0.742078
0.834716			1.46358			0.748394	0.293965		0.919288	0.761343
0.884909			1.89411			0.705368			0.868394
0.875164			0.991212			0.916465			0.950174
1.01189			0.9965			0.765622			0.733275
1.08191			1.1234			2.23223			1.21135
1.38753			0.530359			1.19216			1.05618
						0.892422
						0.845897
