# Supplementary material for: Lymphangiogenic therapy prevents cardiac dysfunction by ameliorating inflammation and hypertension
Source: eLife. 2020 Nov 17;9:e58376. doi: 10.7554/eLife.58376 (PMC7695461; doi:10.7554/eLife.58376)
Supplement: Figure 2—source data 1. [file elife-58376-fig2-data1.xlsx]

## Sheet: sheet 1
B. FS (%)				C. EF(%)				D. LV mass index				E. RWT
ctrl	angII	angII+VEGFCc156s		ctrl	angII	angII+VEGFCc156s		ctrl	angII	angII+VEGFCc156s		ctrl	angII	angII+VEGFCc156s
23.1496	24.4477	27.3657		44.8673	35.1175	50.9681		112.508	201.343	141.966		0.385428	0.690971	0.537164
33.2686	27.6041	22.8361		49.5678	46.2233	40.5835		141.593	179.923	171.657		1.00154	0.787756	0.364673
39.1582	28.2491	20.2812		61.456	37.8694	33.2629		171.207	154.585	130.28		0.434301	0.614255	0.395931
26.3855	28.3839	30.6802		39.3942	35.983	46.795		124.689	244.252	196.391		0.504267	0.740351	0.428612
28.7335	31.2923	34.3959		40.2514	38.7217	41.318		146.837	122.5	170.076		0.527337	0.516766	0.519046
37.3323	26.3982	36.2953		37.7165	27.7414	56.1627		164.893	292.695	145.174		0.843005	0.922614	0.644888
20.535	35.203	43.4399		34.8533	26.7191	54.8117		131.42	180.327	159.934		0.360223	0.450369	0.658732
35.0565	25.8199	38.4194		38.997	25.9426	60.7945		187.489	173.569	137.384		0.710398	0.859336	0.7616
31.4484	30.0713	30.1314		50.6046	38.927	58.1808		138.638	219.968	147.354		1.10069	0.58593	0.430194
24.6455	27.6155	41.7886		44.5821	24.4352	65.2237		134.706	273.63	172.246		0.447858	1.16571	0.553166
32.7562	26.3188	38.5023		31.7198	35.9027	56.489		110.986	230.651	169.064		0.505206	0.529516	0.482519
28.9443	20.7951	30.6673		45.7176	33.1133	48.8905		88.1087	267.091	172.988		0.442549	0.87825	0.465336
41.8466	27.5302	27.4289		51.6191	39.1846	51.903		164.812	232.368	138.506		0.660779	1.04981	0.377898
26.0362	32.4781	32.7246		56.6181	51.5624	55.4774		123.038	134.048	149.79		0.368228	0.674196	0.418245
27.1889	29.851	32.6935		51.5646	46.0562	43.5419		144.719	204.745	112.74		0.670775	0.74284	0.428174
35.289	23.1306	31.033		41.8169	47.2035	44.662		214.41	147.498	139.876		0.682385	0.806922
29.4342	16.6214	28.38		56.7914	35.7986	51.485		159.044	186.771	176.116		0.338089	0.46947
30.3278	17.141			60.1721	30.5758			112.555	187.167			0.534904	0.538198
27.0209	24.2227			50.0583	37.5967			120.882	202.571			0.33046	0.740879
25.0707	20.7847			54.8398	35.3729			134.507	140.113			0.419598	0.5965
30.152	16.3741			51.6647	25.8453			164.486	210.969			0.417538	0.355441
24.111	19.6231			53.8509	61.0945			116.179	174.029			0.366957	0.730726
38.926	13.8239			46.7937	25.1072			148.946	210.704			0.326032	0.453143
35.5279	9.50754							108.468	176.732			0.46652	0.507937
F. heart weight/tibia length				G. lung weight/tibia length				H. nppb expression				J. podoplanin+ lymphatic vessel density				K.podoplanin+ lymphatic vessel lumen area
ctrl	angII	angII+VEGFCc156s		ctrl	angII	angII+VEGFCc156s		ctrl	angII	angII+VEGFCc156s		ctrl	angII	angII+VEGFCc156s		ctrl	angII	angII+VEGFCc156s
7.05952	9.0281	7.30168		8.47561	9.85363	8.7956		0.546033	5.82656	2.51579		1.26858	0.677777	1.15223		1511.89	1297.42	1155.33
6.52993	9.20487	6.10658		7.36499	10.1219	7.50952		0.744391	4.10755	1.53451		0.892199	0.617064	1.25306		1059.95	1636.47	1165.96
6.32247	8.45654	7.94576		8.2191	8.71674	7.39758		1.09551	2.68122	2.1637		1.24337	0.725838	1.69807		1052.78	1428.19	1543.94
6.3427	8.61969	7.89617		8.1778	10.8154	7.23497		0.997617	2.66072	1.79431		0.407084	0.965988	1.21749		1161.78	1115.05	1287.44
5.93595	7.53529	7.62178		6.92084	7.33529	6.2808		0.534274	1.06405	1.80041		0.538321	1.01306	1.11768		1066.81	1018.53	1488.31
6.58324	9.79702	7.48777		9.10464	10.197	7.70527		1.04574	4.13021	2.68876		0.658716	1.11574	1.30523		900.653	1259.35	1283.05
7.80638	8.80874	9.01074		7.11061	8.65027	8.38892		1.77532	3.92391	2.037		0.95283	0.781991	1.06261		1435.83	1238.68	1226.78
6.16817	10.3692			7.38297	10.6659			1.26112	4.86199	1.04313		0.552484	0.645493	0.550198		1003.93	1550.8	1286.13
6.21545	7.59566			9.91972	9.29754				2.77244	1.93576		0.948045	1.00733	0.81847		1895.24	1492.57	1474.36
7.37047	9.74314			7.44529	8.24869							0.917383	0.810989	0.695847		1101.87	1193.23	1281.8
11.5367	13.9586			9.4881	9.9944							1.19634	0.68311	0.894027		1255.84	1101.64	998.684
7.37047	11.5703				10.42							1.0645	1.28991	1.57805		1273.21	1159.04	1256.61
9.63895	11.2864				8.92617							1.38304	0.811826	1.06342		1111.2	1256.14	1046.06
	8.66379				11.2069							0.863162	0.655993	1.02051		1250.65	1260.05	1394.3
	8.91101				9.2346							1.44199	0.918497	1.08518		1274.48	1056.14	1154.12
	13.6397				9.80048							1.0418	0.924793	1.02718		1247.29	1269.46	1340.35
	11.0656				9.47622							1.53368	0.907182	1.06506		1913.21	1133.69	1203.71
					10.6005							1.41994	1.07981	0.651883		1444.59	1238.04	1038.21
												0.80691	1.07703	0.692405		1285.34	1255.06	1503.36
												0.949281	0.499939	0.846209		1071.17	1290.92	1179.85
												0.69118	0.935502	0.668798		1070.02	1250.35	988.529
												1.21724	0.950147	1.16767		1717.26	1234.21	1142.97
												0.936152	0.771236	1.01775		1370.68	1332.14	968.314
												1.07577	1.35364	0.958179		1397.72	1118.67	1628.33
												2.73102	1.11046	1.01938		1081.71	1047.24	1000.37
												1.18659	0.895417	1.38179		915.98	1205.87	665.057
												1.55634	0.858194	0.796869		917.881	1299.69	684.309
												0.081839	0.914188	0.459866		1205.39	1279.17	1195.25
												0.432996	1.01844	0.652086		571.643	1073.78	877.533
												0.430349	1.32831	1.78744		1176.24	1249.89	1192.3
												1.45719	0.734642	0.637116		1445.98	705.892	721.313
												0.367897	0.301604	0.821468		1186.8	891.053	830.514
												0.785679	0.209677	1.07282		951.048	562.347	1010.2
												0.640282	0.270584	0.825218		1059.63	981.13	803.947
												0.933141	0.759579	0.697232		1010.94	1188.49	1127.93
												0.587505	0.314116	0.679842		1155.28	685.295	756.909
												0.756735	0.107653	0.794549		842.465	1245.81	809.51
												0.642183	0.161614	0.975442		799.581	784.019	1022.28
												1.56943	0.393418	1.19886		828.734	877.533	888.236
												1.0841	0.15632	0.59847		664.064	813.312	658.044
												1.42743	0.485277	0.918288		871.195	1021.67	1223.56
												1.78836	0.473953	0.94816		1106.49	1196.8	1560.78
												0.776993	0.329466	0.316586		784.301	555.165	1143.5
												1.17554	0.737033	1.48633		938.181	932.457	1309.43
												0.993399	0.756283	0.690788		750.783	913.276	1100.13
												0.874195	0.590642	1.11192		1175.13	933.753	1149.83
												1.34697	0.377071	1.18727		828.446	1045.16	1125.33
												0.373914	0.402206	1.94376		568.685	856.89	914.463
												1.19151	1.16155	0.46047		1382.19	1183.56	961.188
												0.835247	1.77594	1.28051		932.397	1004.99	1864.91
												1.33773	0.3574	0.637919		1449.68	1254.61	816.27
												0.700646	1.36588	0.66838		994.411	688.615	991.789
												0.642855	0.296458	0.883316		987.986	872.644	1339.6
												0.662207	0.313002	0.740405		1148.66	764.725	805.919
												1.01893	1.50936	1.01598		834.132	654.347	1072.98
												1.05567	0.985976	0.993558		940.247	617.061	1145.09
												1.16801	1.55185	0.918895		944.482	1024.74	1360.37
												1.03077	0.188465	0.47103		883.447	731.404	745.954
												0.604582	0.685917	1.09793		789.62	1168.14	1338.1
												0.834009	0.599763	1.21929		1096.7	673.465	1039.77
												1.3992	0.807861	0.881005		779.169	895.753	1497.17
												0.639653	0.682634	1.47599		1114.37	768.387	1072.52
												1.55491	0.924481	1.19651		817.256	836.466	1273.18
												0.863889	0.381849	0.578505		806.51	846.796	946.237
												1.81377	0.670537	1.01331		1099.19	822.607	1099.72
												1.62006	0.392044	0.84816		1521.63	1034.57	1074.92
												0.737006	0.729417	0.95592		902.883	988.418	993.947
												0.807318	0.363854	1.04881		1009.11	1133.67	1167.94
												0.439931	0.544991	0.593946		784.341	788.808	1156.59
												0.880274	0.860548	1.11879		1143.13	1205.71	914.379
												1.08748	1.15991	0.596462		959.574	1133.94	2195.81
												1.07461	0.982139	0.8976		862.428	640.172	1048.14
													0.798023				939.668
													0.394162				934.063
													0.924448				969.159
													0.832978				1313.72
													0.779244				1333.21
													1.13455				906.954
													1.24807				1225.62
													1.65009				725.348
													0.957835				624.596
													1.4997				1018.96
													0.531094				998.367
													0.737407				832.219
													0.719638				1206.96
													0.829468				644.735
													1.45267
													0.81879
													0.633571
													0.420648
