# Supplementary material for: Lymphangiogenic therapy prevents cardiac dysfunction by ameliorating inflammation and hypertension
Source: eLife. 2020 Nov 17;9:e58376. doi: 10.7554/eLife.58376 (PMC7695461; doi:10.7554/eLife.58376)
Supplement: Figure 3—source data 1. [file elife-58376-fig3-data1.xlsx]

## Sheet: Sheet1
B. Cadaverine area (%)				C. Qdot plasma concentration				D. heart wet to dry weight ratio
ctrl	angII	angII+VEGFCc156s		ctrl	angII	angII+VEGFCc156s		ctrl	angII	angII+VEGFCc156s
0.536901	7.10221	4.88865		0.932841	0.134578	0.510696		3.99327	3.92366	3.71976
0.070182	8.32159	5.08148		1.06301	0.660703	1.37054		3.38506	3.87775	3.17281
2.31657	9.52968	5.99036		1.10618	0.826397	0.831713		3.38757	3.58396	3.34491
1.19626	7.46707	3.12383		1.10541	0.674835	0.845974		3.36012	3.54916	3.35859
0.799638	14.7984	4.25256		0.888889	0.743291	1.087		3.20896	3.3534	3.41687
1.97565	6.04436	2.51363		0.848827	0.50914	0.977181		3.41692	3.61454	3.52655
2.17711	7.12759	1.76238		1.05497	0.443018	0.557111		3.76011	3.57428	3.40701
0.516452	6.5371	4.3429		0.727071	0.494749	1.35492		3.63123	3.82366	3.49127
0.137002	6.55677	3.23823		1.27793	0.178011	0.807671		3.7483	3.90029	3.45368
0.274118	8.06842	3.01158		0.994997	0.55011	1.25125		3.73729	3.89575
	6.97164	3.66683			0	0.722346		3.29284	3.77212
	4.99115	3.45897			0.744858	0.859088		3.28417	3.79841
	4.72749				0.626737			3.43598	3.83846
	7.10288				1.0478			3.30357	3.60674
	4.71306				0.244858			3.41877	3.64783
	6.43583				0.858438				3.52747
	6.29631								3.58962
	8.83686								3.55077
	5.81631								3.37731
									3.32689
									3.5805
									3.35714
