# Supplementary material for: Lymphangiogenic therapy prevents cardiac dysfunction by ameliorating inflammation and hypertension
Source: eLife. 2020 Nov 17;9:e58376. doi: 10.7554/eLife.58376 (PMC7695461; doi:10.7554/eLife.58376)
Supplement: Figure 4—source data 1. [file elife-58376-fig4-data1.xlsx]

## Sheet: Sheet1
D. plasma KC/GRO level				E. skin IP-10 level				F. Skin MDC level				H. macrophage density in heart				I. macrophage density near arteries in heart
ctrl	angII	angII+VEGFCc156s		ctrl	angII	angII+VEGFCc156s		ctrl	angII	angII+VEGFCc156s		ctrl	angII	angII+VEGFCc156s		ctrl	angII	angII+VEGFCc156s
1.76385	1.59177	0.842203		1.02013	1.67451	0.821672		2.07325	2.05213	0.783778		0.806672	1.0633	0.860223		0.663749	0.879144	0.905501
0.68773	1.0796	1.50596		0.838136	1.41985	0.84233		0.73864	1.65312	0.408909		1.17197	1.72756	1.15671		1.69218	2.85822	0.62348
1.61447	2.70837	0.940062		0.986851	0.970105	1.24512		1.00555	0.887965	1.57313		0.954569	1.84888	1.16542		0.854	1.66041	0.562733
1.17235	0.924933	0.586633		0.979945	1.08771	1.06597		0.504331	2.089	1.48256		1.02971	3.17185	1.19392		0.717472	4.58441	0.955853
1.21107	1.20296	0.763449		1.0696	1.25192	1.10952		0.50252	1.53699	0.644555		0.803089	1.55219	1.68246		0.869092	1.51794	1.9008
0.469151	1.60385	1.29026		1.00852	1.64547	1.18333		1.25379	1.61365	1.08196		1.13934	3.13714	1.34931		1.95812	7.28926	0.958974
0.981204	1.11786	1.52284		1.09682	0.90749	1.19366		0.921925	0.975696	1.00555		1.10201	2.02404	1.50471		0.71353	4.51011	1.1004
0.804945	0.926033	0.652279			1.42777	0.982556			2.21674	0.806644		0.992531	2.53159	1.46847		0.531847	4.52469	0.683089
0.799935	0.926514	1.24023			1.96239				2.09177				1.03417				1.25486
0.811897	1.58684	0.800326
1.02259	0.943984	0.996049
1.09294	1.06432	1.17861
1.23512	1.316	1.48861
1.34192	1.16028	1.22741
0.666532	1.02197	1.32149
0.759829	1.28378	1.76948
0.564514	3.44356
	1.34081
	1.44704
	1.84738
	1.54187
