# Supplementary material for: Lymphangiogenic therapy prevents cardiac dysfunction by ameliorating inflammation and hypertension
Source: eLife. 2020 Nov 17;9:e58376. doi: 10.7554/eLife.58376 (PMC7695461; doi:10.7554/eLife.58376)
Supplement: Figure 5—source data 1. [file elife-58376-fig5-data1.xlsx]

## Sheet: Sheet1
C. mean blood pressure baseline				D. mean blood pressure week 1				E. mean blood pressure week 4				F. Pulse wave velocity				G. Ace2 expression
ctrl	angII	angII+VEGFCc156s		ctrl	angII	angII+VEGFCc156s		ctrl	angII	angII+VEGFCc156s		ctrl	angII	angII+VEGFCc156s		ctrl	angII	angII+VEGFCc156s
98.8875	103.661	105.895		101.761	158.73	139.189		107.449	168.24	112.462		4.33584	5.63838	4.67292		0.989514	1.41691	1.04023
100.322	102.09	101.519		98.6397	150.716	156.078		100.433	173.503	105.189		4.10824	5.78182	5.42483		1.13446	1.07796	1.11074
103.136	101.835	103.46		105.26	123.603	162.647		107.319	138.89	107.012		4.5131	5.54285	4.77481		1.11798	1.2216	0.945997
105.507	99.1096	98.0928		105.861	163.22	126.366		107.722	108.919	109.621		4.39426	5.19032	5.89146		1.12807	1.33171	1.23992
103.86	109.429	106.05		108.664	157.562	153.165		106.677	136.791	122.042		4.4647	5.48852	4.71235		0.9921	1.41685	1.06533
106.353	97.8565	100.235		106.266		151.664		109.423	131.374	110.751		3.09686	5.67394	5.16101		0.861814	1.29826	1.13313
												4.57305	4.78885	5.33237		0.870682	1.11935	1.05468
												4.42511	5.02652	6.55413		1.02297	1.06487	1.22551
												4.13819	6.16268	5.87324		0.981884	0.937408	1.11981
												4.78808	3.96896			0.900405	1.34311	0.979102
												5.20437	5.41665			0.862705	1.16887	1.37555
													6.1247			1.08934	0.871734	1.36003
													4.85999			0.99067	0.936544	1.19464
													3.63121			1.21416	1.09422	1.06713
													4.69289			0.832863	1.17138	1.06063
													3.82595			1.05654	1.07341	1.3774
													3.36123			0.953857	1.02394
													6.34831				1.03858
													6.37942				0.999556
																	1.1296
																	1.36509
