# Supplementary material for: Lymphangiogenic therapy prevents cardiac dysfunction by ameliorating inflammation and hypertension
Source: eLife. 2020 Nov 17;9:e58376. doi: 10.7554/eLife.58376 (PMC7695461; doi:10.7554/eLife.58376)
Supplement: Figure 6—source data 1. [file elife-58376-fig6-data1.xlsx]

## Sheet: Sheet1
A. urine volume				B. Urine NEFA				C. Urine protein				D. ACR
ctrl	angII	angII+VEGFCc156s		ctrl	angII	angII+VEGFCc156s		ctrl	angII	angII+VEGFCc156s		ctrl	angII	angII+VEGFCc156s
1.15	3.1	1.5		0.138932	1.01776	0.13029		38.5081	38.563	23.1643		19.4657	68.6654	25.014
1.35	6.8	3.7		0.140279	1.83015	0.627002		40.8897	70.8014	42.8477		21.0136	66.838	50.8882
1.55	5	3.2		0.18197	1.3284	0.843616		43.0132	85.422	37.7958		18.3017	61.7237	34.4683
1.55	10.8	1.8		0.143933	2.9659	0.4509		47.1631	69.7439	50.1403		19.8198	68.1638	30.0235
1.3	7.1	2.6		1.58662	1.73041	0.84994		40.7218	62.6242	47.8686		31.3275	75.892	45.0219
0.4	1.3	2.95		0.122556	0.187928	1.10056		19.0955	42.7164	58.4393		20.6201	25.3828	37.8104
1.45	4.8	3.6		0.491652	1.13198	0.667836		40.2975	63.9464	43.1307		23.144	51.4793	35.7836
	5.2	4.2			1.36874	0.968856			61.6179	22.2803			37.1002	38.2546
	1.4	0.5			0.366198	0.196685			42.0211				28.0089	23.9293
	6.8				1.67096				67.6287				72.2628
E. Lyve1 expression				F. Pdpn expression
ctrl	angII	angII+VEGFCc156s		ctrl	angII	angII+VEGFCc156s
1.29458	2.42388	0.880605		0.941995	1.4373	1.12114
0.89781	1.80188	0.511992		0.864335	1.76761	1.06012
1.41397	2.09333	1.05787		0.973955	1.50996	0.966593
0.38269	0.845673	0.820647		0.801841	0.904295	1.00478
1.07508	1.55735	0.420751		0.91823	1.34389	0.839656
0.61731	1.08811	0.590719		0.902281	1.52136	1.04695
0.579249	1.06882	1.09645		0.9572	1.24543	1.12024
0.794056	4.51877	0.857143		0.914531	1.22014	1.17503
1.3561	1.65224	0.718978		1.17073	1.23784	1.19566
0.93952	1.42649	1.09645		0.827445	1.71066	1.3256
0.48488	3.51251	0.332638		0.737688	1.49553	0.966751
0.676225	1.06413	1.19395		0.865221	1.36741	1.26647
2.02138	0.982273	0.805005		1.13376	1.26808	1.10978
1.09906	1.31804	1.58863		1.11281	1.29615	0.982822
0.442127	0.831595	1.13764		0.861337	1.22545	1.02666
2.09854	1.22888	0.732013		0.96046	1.19008	1.19711
0.827946	1.94473			2.05617	1.26391
	1.55422				1.18939
	0.815433				1.39817
	1.21012				1.27143
	2.35141				1.54462
