# Supplementary material for: Lymphangiogenic therapy prevents cardiac dysfunction by ameliorating inflammation and hypertension
Source: eLife. 2020 Nov 17;9:e58376. doi: 10.7554/eLife.58376 (PMC7695461; doi:10.7554/eLife.58376)
Supplement: Figure 7—source data 1. [file elife-58376-fig7-data1.xlsx]

## Sheet: Sheet1
B. FS					C.EF					D. LV mass index					E. RWT
ctrl	ctrl+VEGFCc156s	angII	angII+VEGFCc156s		ctrl	ctrl+VEGFCc156s	angII	angII+VEGFCc156s		ctrl	ctrl+VEGFCc156s	angII	angII+VEGFCc156s		ctrl	ctrl+VEGFCc156s	angII	angII+VEGFCc156s
45.8882	40.5135	53.2853	54.0473		69.0398	70.8308	68.9955	70.6933		105.699	86.279	135.668	101.311		0.606988	0.446431	0.905876	0.895729
35.8668	29.4447	59.4388	55.4331		57.969	54.3701	72.3996	75.0498		106.218	118.219	127.344	136.357		0.433646	0.463018	0.799865	0.910917
55.5556	32.5108	42.5955	65.8216		76.3081	57.784	57.6758	71.2443		104.681	116.376	107.539	134.145		0.445691	0.55355	0.519018	0.860949
46.7541	54.6958	51.8075	55.9454		71.7895	64.8058	71.8227	75.9909		101.499	103.366	151.886	130.682		0.486116	0.739003	0.901902	0.701516
51.4713	52.9672	41.9399	56.3398		79.8801	73.0966	65.9552	64.875		127.634	81.5542	127.816	100.044		0.621694	0.588566	0.920509	0.657783
38.0387	32.5286	50.6164	36.099		65.7022	52.8811	79.1301	72.9966		108.939	91.2989	133.087	105.758		0.536408	0.459096	0.653576	0.732445
45.4167	60.7045	56.4345	41.7547		66.948	77.6713	78.8651	68.4375		104.388	73.125	127.214	119.093		0.530685	0.561849	1.0377	0.617377
40.6572	29.9628	59.5327	39.7335		76.8901	55.8189	74.2934	56.3922		120.083	106.686	102.321	124.828		0.539518	0.386787	0.638838	1.03044
52.1666	41.1467	54.4467	39.2126		73.2675	64.2826	77.9542	70.4152		101.827	96.0752	143.9	160.014		0.403699	0.476122	0.955363	1.13363
41.1424	42.453	46.3276	32.3189		80.5105	69.055	64.5132	72.7232		105.532	97.0063	145.077	128.713		0.442883	0.455774	0.740284	0.710792
53.3916	38.2192	30.9058	24.8492		82.7558	70.2952	63.3578	53.6548		100.054	105.658	114.419	119.363		0.530893	0.399507	0.4705	0.617236
56.4069	35.9055	36.3931	33.2401		74.6506	71.9443	64.0665	61.9794		104.928	99.4767	125.669	130.619		0.532307	0.482157	0.65771	0.559082
50.9295	42.2409	41.432	44.9644		76.843	72.6495	79.6763	65.6026		101.238	85.8959	110.861	121.541		0.497059	0.516931	0.664128	1.16213
		52.5523	52.7183				74.154	74.4874				159.708	117.877				1.00416	0.549914
		35.2213	35.1382				73.6643	61.2261				100.974	129.864				0.684875	0.63879
		25.7208	41.7548				48.0706	59.2999				129.126	133.02				0.810202	0.676095
		27.7239	49.9463				49.9437	74.6813				219.384	106.374				0.789729	0.552291
F.Heart weight/tibia length					G.Lung weight/tibia length					H.nppb					I.Col1a1
ctrl	Ctrl+VEGFCc156s	angII	angII+VEGFCc156s		ctrl	Ctrl+VEGFCc156s	angII	angII+VEGFCc156s		ctrl	Ctrl+VEGFCc156s	angII	angII+VEGFCc156s		ctrl	Ctrl+VEGFCc156s	angII	angII+VEGFCc156s
6.69535	6.28637	9.53553	7.18391		8.06655	8.14604	13.5199	10.2241		0.853691	0.734537	2.27553	0.718125		1.0752	0.939079	37.2892	3.13591
5.99317	6.3061	8.18849	6.56497		9.04952	8.10127	7.78781	8.25424		0.836135	0.589896	2.60445	0.971162		0.910494	0.838716	20.116	2.58932
6.23699	6.65161	6.88757	7.51416		7.3815	8.18746	9.64497	10.0113		2.21422	0.536254	0.478936	1.08421		1.5458	0.888729	5.39132	6.54994
6.22286	6.6198	7.00171	6.90838		8.58286	7.91339	9.3261	9.19056		1.17298	0.502138	2.68545	1.06426		0.805886	0.974993	13.1687	1.70188
6.28588	6.58837	6.83732	7.15183		7.91619	7.88591	9.10125	9.52626		0.48687	0.64276	0.977551	1.06041		0.734525	1.03084	4.92052	6.03364
6.69555	6.71364	7.63249	7.19864		9.67071	7.97632	8.76728	9.80758		0.436102	0.296589	3.91335	1.40027		0.928096	0.662385	7.52109	2.68571
		7.37052	6.65153				9.04952	9.81839				2.93566	0.925155				7.08154	6.63266
		7.79478	7.20045				9.56349	9.17093				3.15445	1.85522				6.43027	3.96125
J.Col3a1					L.PSR area/total area					M. cd68					N.macrophage density in heart
ctrl	Ctrl+VEGFCc156s	angII	angII+VEGFCc156s		ctrl	Ctrl+VEGFCc156s	angII	angII+VEGFCc156s		ctrl	Ctrl+VEGFCc156s	angII	angII+VEGFCc156s		ctrl	Ctrl+VEGFCc156s	angII	angII+VEGFCc156s
0.824629	0.469784	37.3394	3.98032		0.007868	0.008026	0.015922	0.013441		1.19111	1.17483	4.36521	1.27976		0.447816	0.646585	3.48269	2.71789
0.822298	0.397809	27.2652	4.08624		0.008567	0.007542	0.017661	0.011363		1.17531	1.00526	2.77487	1.30627		1.07728	1.05083	1.99556	1.5926
2.18048	0.328051	6.05601	2.60169		0.009221	0.004651	0.014147	0.008527		1.11849	0.93282	1.50768	1.42425		0.60192	0.826302	2.73057	2.22451
0.628367	0.597693	14.1135	2.87996		0.00738	0.013872	0.008978	0.01082		0.979833	1.1777	2.21508	1.31671		1.07107	1.27718	2.84692	2.63286
1.05167	0.657502	7.03856	11.1759		0.004375	0.009589	0.042077	0.007079		0.709559	1.00704	1.40993	1.9912		0.821581	1.13002	2.16792	1.51801
0.492556	0.1851	7.34104	2.36133		0.005337	0.004725	0.018947	0.03702		0.825701	0.922939	1.46636	1.23934		2.00114	1.21822	4.37226	3.20534
		9.41486	6.64238		0.004987	0.005117	0.033561	0.007824				1.79026	1.62369		0.979185	0.724886	2.58742	2.43914
		9.18816	5.06234				0.020844	0.014595				2.03686	1.45523				2.91718	1.83386
							0.027354	0.007709									5.58454	2.69225
								0.01339									4.70307	2.02699
